# Supplementary material for: Multi Evaluation of a Modified GoldNano Carb Test for Carbapenemase Detection in Clinical Isolates of Gram-Negative Bacilli
Source: MDPI journal article supplement (doi:10.3390/antibiotics11050684), 2022-05-18
Supplement: s1 [file s1]

## Supplementary Materials

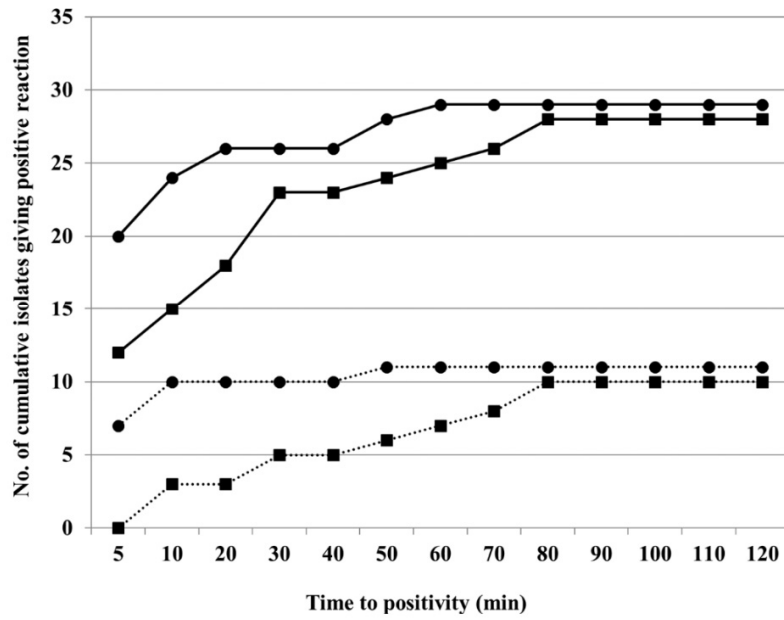

**Figure S1.** Time to positivity by the modified GoldNano Carb test (●) compared with the conventional GoldNano Carb test (■) among 29 carbapenemase producers (solid lines) and 11 OXA producers (dashed lines).

**Table S1.** Detail of Gram-negative bacilli clinical isolates collected from six hospitals

| Organisms                 | No. of isolates from each hospital |                  |                  |                       |                  |                  | Total |
|---------------------------|------------------------------------|------------------|------------------|-----------------------|------------------|------------------|-------|
|                           | A                                  | B                | C                | D                     | E                | F                |       |
| Collection period between | Jun and Jul 2019                   | May and Aug 2020 | Feb and Aug 2019 | Sep 2019 and Jan 2020 | Jan and Aug 2020 | Feb and Aug 2019 |       |
| Enterobacterales          | 105                                | 124              | 94               | 72                    | 53               | 47               | 495   |
| <i>Acinetobacter</i> spp. | 63                                 | 44               | 0                | 68                    | 37               | 0                | 212   |
| <i>P.aeruginosa</i>       | 59                                 | 21               | 0                | 24                    | 21               | 0                | 125   |
| Total                     | 227                                | 189              | 94               | 164                   | 111              | 47               | 832   |

A & B, Northeast; C & D, Central; E, West; F, South.

**Table S2.** Carbapenemase genes in clinical isolates collected from the six hospitals

| Hospitals/Gram<br>negative bacteria | No. of isolates with carbapenemase genes |                           |                           |                           |                              |                              |                              |                           |                           |                              |                              |                              |                              |                                                | Non-<br>carbapenemases | Total |            |
|-------------------------------------|------------------------------------------|---------------------------|---------------------------|---------------------------|------------------------------|------------------------------|------------------------------|---------------------------|---------------------------|------------------------------|------------------------------|------------------------------|------------------------------|------------------------------------------------|------------------------|-------|------------|
|                                     | <i>bla</i> <sub>OXA-48</sub>             | <i>bla</i> <sub>NDM</sub> | <i>bla</i> <sub>VIM</sub> | <i>bla</i> <sub>IMP</sub> | <i>bla</i> <sub>OXA-23</sub> | <i>bla</i> <sub>OXA-58</sub> | <i>bla</i> <sub>IMP</sub>    | <i>bla</i> <sub>NDM</sub> | <i>bla</i> <sub>NDM</sub> | <i>bla</i> <sub>NDM</sub>    | <i>bla</i> <sub>NDM</sub>    | <i>bla</i> <sub>NDM</sub>    | <i>bla</i> <sub>OXA-23</sub> | <i>bla</i> <sub>NDM</sub>                      |                        |       |            |
|                                     | like                                     |                           |                           |                           | like                         | like                         | <i>bla</i> <sub>OXA-48</sub> | <i>bla</i> <sub>IMP</sub> | <i>bla</i> <sub>VIM</sub> | <i>bla</i> <sub>OXA-48</sub> | <i>bla</i> <sub>OXA-23</sub> | <i>bla</i> <sub>OXA-58</sub> | like <sub>7</sub>            | <i>bla</i> <sub>OXA-23</sub> like <sub>7</sub> |                        |       |            |
|                                     |                                          |                           |                           |                           |                              |                              | like                         |                           |                           | like                         | like                         | like                         | <i>bla</i> <sub>OXA-58</sub> | <i>bla</i> <sub>OXA-58</sub> like              |                        |       |            |
|                                     |                                          |                           |                           |                           |                              |                              |                              |                           |                           |                              |                              |                              |                              | like                                           |                        |       |            |
| <b>A</b>                            |                                          |                           |                           |                           |                              |                              |                              |                           |                           |                              |                              |                              |                              |                                                |                        |       | <b>227</b> |
| <i>K.pneumoniae</i>                 | 14                                       | 10                        |                           |                           |                              |                              |                              |                           |                           |                              |                              |                              |                              |                                                |                        | 22    | 46         |
| <i>E.coli</i>                       | 1                                        | 1                         |                           |                           |                              |                              |                              |                           |                           |                              |                              |                              |                              |                                                |                        | 42    | 44         |
| <i>P.mirabilis</i>                  |                                          |                           |                           |                           |                              |                              |                              |                           |                           |                              |                              |                              |                              |                                                |                        | 5     | 5          |
| <i>Enterobacter</i> spp.            |                                          |                           |                           |                           |                              |                              |                              |                           |                           |                              |                              |                              |                              |                                                |                        | 4     | 4          |
| <i>Klebsiella</i> spp.              |                                          |                           |                           |                           |                              |                              |                              |                           |                           |                              |                              |                              |                              |                                                |                        | 3     | 3          |
| <i>P.vulgaris</i>                   |                                          |                           |                           |                           |                              |                              |                              |                           |                           |                              |                              |                              |                              |                                                |                        | 1     | 1          |
| <i>M.morganii</i>                   |                                          |                           |                           |                           |                              |                              |                              |                           |                           |                              |                              |                              |                              |                                                |                        | 1     | 1          |
| <i>C.koseri</i>                     |                                          |                           |                           |                           |                              |                              |                              |                           |                           |                              |                              |                              |                              |                                                |                        | 1     | 1          |
| <i>A.baumannii</i>                  |                                          |                           |                           |                           | 27                           |                              |                              |                           |                           |                              | 2                            |                              | 1                            |                                                |                        | 33    | 63         |
| <i>P.aeruginosa</i>                 |                                          | 2                         | 3                         | 3                         |                              |                              |                              | 1                         |                           |                              |                              |                              |                              |                                                |                        | 50    | 59         |
| <b>B</b>                            |                                          |                           |                           |                           |                              |                              |                              |                           |                           |                              |                              |                              |                              |                                                |                        |       | <b>189</b> |
| <i>K.pneumoniae</i>                 | 19                                       | 14                        |                           |                           |                              |                              |                              |                           |                           | 1                            |                              |                              |                              |                                                |                        | 34    | 68         |
| <i>E.coli</i>                       | 2                                        | 21                        |                           |                           |                              |                              |                              |                           |                           |                              |                              |                              |                              |                                                |                        | 31    | 54         |
| <i>K.aerogenes</i>                  |                                          | 2                         |                           |                           |                              |                              |                              |                           |                           |                              |                              |                              |                              |                                                |                        |       | 2          |
| <i>A.baumannii</i>                  |                                          | 1                         |                           |                           | 32                           | 2                            |                              |                           |                           |                              |                              |                              | 3                            |                                                |                        | 6     | 44         |
| <i>P.aeruginosa</i>                 |                                          | 10                        | 2                         | 2                         |                              |                              |                              |                           |                           |                              |                              |                              |                              |                                                |                        | 7     | 21         |
| <b>C</b>                            |                                          |                           |                           |                           |                              |                              |                              |                           |                           |                              |                              |                              |                              |                                                |                        |       | <b>94</b>  |
| <i>K.pneumoniae</i>                 | 52                                       | 8                         |                           |                           |                              |                              |                              |                           |                           | 2                            |                              |                              |                              |                                                |                        | 8     | 70         |
| <i>E.coli</i>                       | 5                                        |                           |                           |                           |                              |                              | 1                            |                           |                           | 1                            |                              |                              |                              |                                                |                        | 9     | 16         |
| <i>Proteus</i> spp.                 | 1                                        |                           |                           |                           |                              |                              |                              |                           |                           |                              |                              |                              |                              |                                                |                        | 3     | 4          |
| <i>Enterobacter</i> spp.            | 1                                        |                           |                           |                           |                              |                              |                              |                           |                           |                              |                              |                              |                              |                                                |                        | 1     | 2          |
| <i>Serratia</i> spp.                |                                          |                           |                           |                           |                              |                              |                              |                           |                           |                              |                              |                              |                              |                                                |                        | 1     | 1          |
| <i>M.morganii</i>                   |                                          |                           |                           |                           |                              |                              |                              |                           |                           |                              |                              |                              |                              |                                                |                        | 1     | 1          |
| <b>D</b>                            |                                          |                           |                           |                           |                              |                              |                              |                           |                           |                              |                              |                              |                              |                                                |                        |       | <b>164</b> |

| Hospitals/Gram<br>negative bacteria | No. of isolates with carbapenemase genes |                           |                           |                           |                              |                              |                              |                           |                           |                              |                              |                              |                              |                                   | Non-<br>carbapenemases | Total      |
|-------------------------------------|------------------------------------------|---------------------------|---------------------------|---------------------------|------------------------------|------------------------------|------------------------------|---------------------------|---------------------------|------------------------------|------------------------------|------------------------------|------------------------------|-----------------------------------|------------------------|------------|
|                                     | <i>bla</i> <sub>OXA-48</sub>             | <i>bla</i> <sub>NDM</sub> | <i>bla</i> <sub>VIM</sub> | <i>bla</i> <sub>IMP</sub> | <i>bla</i> <sub>OXA-23</sub> | <i>bla</i> <sub>OXA-58</sub> | <i>bla</i> <sub>IMP</sub>    | <i>bla</i> <sub>NDM</sub> | <i>bla</i> <sub>NDM</sub> | <i>bla</i> <sub>NDM</sub>    | <i>bla</i> <sub>NDM</sub>    | <i>bla</i> <sub>NDM</sub>    | <i>bla</i> <sub>OXA-23</sub> | <i>bla</i> <sub>NDM</sub>         |                        |            |
|                                     | like                                     |                           |                           |                           | like                         | like                         | <i>bla</i> <sub>OXA-48</sub> | <i>bla</i> <sub>IMP</sub> | <i>bla</i> <sub>VIM</sub> | <i>bla</i> <sub>OXA-48</sub> | <i>bla</i> <sub>OXA-23</sub> | <i>bla</i> <sub>OXA-58</sub> | like                         | <i>bla</i> <sub>OXA-23</sub> like |                        |            |
|                                     |                                          |                           |                           |                           |                              |                              | like                         |                           |                           | like                         | like                         | like                         | <i>bla</i> <sub>OXA-58</sub> | <i>bla</i> <sub>OXA-58</sub> like |                        |            |
| <i>K.pneumoniae</i>                 | 5                                        | 11                        |                           | 1                         |                              |                              |                              |                           |                           |                              |                              |                              |                              |                                   | 22                     | 39         |
| <i>E.coli</i>                       |                                          | 2                         |                           |                           |                              |                              |                              |                           |                           |                              |                              |                              |                              |                                   | 14                     | 16         |
| <i>Enterobacter</i> spp.            |                                          |                           |                           | 1                         |                              |                              |                              |                           |                           |                              |                              |                              |                              |                                   | 8                      | 9          |
| <i>Serratia</i> spp.                |                                          |                           |                           |                           |                              |                              |                              |                           |                           |                              |                              |                              |                              |                                   | 4                      | 4          |
| <i>E.aerogenes</i>                  |                                          |                           |                           |                           |                              |                              |                              |                           |                           |                              |                              |                              |                              |                                   | 1                      | 1          |
| <i>E.cloacae</i>                    |                                          |                           |                           |                           |                              |                              |                              |                           |                           |                              |                              |                              |                              |                                   | 1                      | 1          |
| <i>S.marcescens</i>                 |                                          |                           |                           |                           |                              |                              |                              |                           |                           |                              |                              |                              |                              |                                   | 1                      | 1          |
| <i>M.morganii</i>                   |                                          |                           |                           |                           |                              |                              |                              |                           |                           |                              |                              |                              |                              |                                   | 1                      | 1          |
| <i>A.baumannii</i>                  |                                          |                           |                           |                           | 51                           | 4                            |                              |                           |                           |                              | 1                            |                              | 2                            |                                   | 9                      | 67         |
| <i>A.haemolyticus</i>               |                                          | 1                         |                           |                           |                              |                              |                              |                           |                           |                              |                              |                              |                              |                                   |                        | 1          |
| <i>P.aeruginosa</i>                 |                                          |                           | 1                         |                           |                              |                              |                              |                           |                           |                              |                              |                              |                              |                                   | 23                     | 24         |
| <b>E</b>                            |                                          |                           |                           |                           |                              |                              |                              |                           |                           |                              |                              |                              |                              |                                   |                        | <b>111</b> |
| <i>K.pneumoniae</i>                 | 10                                       | 14                        |                           |                           |                              |                              |                              |                           |                           |                              |                              |                              |                              |                                   | 5                      | 29         |
| <i>E.coli</i>                       |                                          | 6                         |                           |                           |                              |                              |                              |                           |                           |                              |                              |                              |                              |                                   | 10                     | 16         |
| <i>Enterobacter</i> spp.            |                                          | 1                         |                           |                           |                              |                              |                              |                           |                           |                              |                              |                              |                              |                                   | 3                      | 4          |
| <i>C.freundii</i>                   |                                          | 1                         |                           |                           |                              |                              |                              |                           |                           |                              |                              |                              |                              |                                   | 1                      | 2          |
| <i>Klebsiella</i> spp.              |                                          | 1                         |                           |                           |                              |                              |                              |                           |                           |                              |                              |                              |                              |                                   | 1                      | 2          |
| <i>A.baumannii</i>                  |                                          | 1                         |                           |                           | 26                           | 2                            |                              |                           |                           |                              |                              | 3                            | 3                            | 1                                 | 1                      | 37         |
| <i>P.aeruginosa</i>                 |                                          | 5                         | 6                         | 7                         |                              |                              |                              | 1                         | 1                         |                              |                              |                              |                              |                                   | 1                      | 21         |
| <b>F</b>                            |                                          |                           |                           |                           |                              |                              |                              |                           |                           |                              |                              |                              |                              |                                   |                        | <b>47</b>  |
| <i>K.pneumoniae</i>                 | 4                                        | 12                        |                           |                           |                              |                              |                              |                           |                           |                              |                              |                              |                              |                                   | 15                     | 31         |
| <i>E.coli</i>                       |                                          | 8                         |                           |                           |                              |                              |                              |                           |                           |                              |                              |                              |                              |                                   | 3                      | 11         |
| <i>Enterobacter</i> spp.            |                                          | 4                         |                           |                           |                              |                              |                              |                           |                           |                              |                              |                              |                              |                                   | 1                      | 5          |
| <b>Total</b>                        | <b>114</b>                               | <b>136</b>                | <b>12</b>                 | <b>14</b>                 | <b>136</b>                   | <b>8</b>                     | <b>1</b>                     | <b>2</b>                  | <b>1</b>                  | <b>4</b>                     | <b>3</b>                     | <b>3</b>                     | <b>9</b>                     | <b>1</b>                          | <b>388</b>             | <b>832</b> |

A & B, Northeast; C & D, Central; E, West; F, South.
